# Supplementary material for: Intermittent theta burst stimulation facilitates functional connectivity from the dorsal premotor cortex to primary motor cortex
Source: PeerJ. 2020 Jul 6;8:e9253. doi: 10.7717/peerj.9253 (PMC7346859; doi:10.7717/peerj.9253)
Supplement: Supplemental Information 1 [file peerj-08-9253-s001.xlsx]

## Sheet: 1mV
FDI	iTBS600							sham-iTBS600
		Baseline	T0	T15	T30	T60			Baseline	T0	T15	T30	T60
		1.08772	1.79529	2.03889	1.80964	1.10126			1.34555	1.47085	1.43347	1.29102	1.11218
		1.20044	0.914795	1.47175	1.29581	1.31498			0.914871	1.07785	1.12883	1.13173	1.07941
		0.914897	0.826921	1.31647	0.561157	0.889337			1.13	1.31053	0.964279	1.0932	0.999206
		1.09897	1.14237	1.48177	0.623741	1.07892			0.581467	0.475525	0.557617	0.597443	0.398331
		0.936325	1.03613	1.33358	1.08701	0.868971			1.37141	1.13428	1.17325	1.20703	1.21294
		1.10157	0.800018	1.45835	0.822479	1.00902			1.32988	1.26151	1.38469	1.21387	1.29736
		1.10884	1.26006	1.47287	1.55809	1.18738			1.12521	0.798843	0.887651	1.1013	0.798391
		1.23813	1.64137	1.83247	0.92746	1.02315			1.23492	0.925774	1.85124	1.5424	1.25523
		1.05409	0.888886	1.59236	0.950073	0.806274			1.90155	2.20758	1.57101	1.89894	2.18445
		1.04455	0.923805	2.74289	1.16763	1.22499			0.528687	0.33197	0.501312	0.333969	0.30365
		1.35748	0.956006	1.05944	0.854207	1.02201			0.500454	0.707588	0.688612	0.444489	0.580529
		0.565796	1.73274	2.14267	1.16687	1.17042			1.07881	1.30899	1.68817	1.57214	1.16779

## Sheet: SICI
FDI	iTBS600							sham-iTBS600
		Baseline	T0	T15	T30	T60			Baseline	T0	T15	T30	T60
		0.240303	0.314793	0.715578	0.212892	0.599425			0.536628	0.660394	0.389661	0.407818	0.368861
		0.574436	0.714663	0.695076	0.691414	0.834236			0.369154	0.457198	0.64342	0.398223	0.57271
		0.108375	0.139963	0.0273187	0.175521	0.109302			0.280301	0.398077	0.322283	0.437939	0.262113
		0.159271	0.363375	0.709533	0.462248	0.226264			0.358698	0.331881	0.264314	0.334497	0.312593
		0.51256	1.2758	0.700657	0.53498	0.678277			0.163613	0.164701	0.139858	0.163297	0.142951
		0.31621	1.03831	0.555002	0.26849	0.33153			0.34285	0.46228	0.419551	0.378613	0.20483
		0.23896	0.918088	0.850124	0.824421	0.547034			0.230009	0.2759	0.667437	0.514056	0.288281
		0.299155	1.40226	0.475796	0.219997	0.275335			0.403351	0.451987	0.453749	0.419796	0.313096
		0.635361	1.05932	0.60917	0.458998	0.646091			0.330381	0.289233	0.192392	0.334713	0.271399
		0.920301	0.920301	1.21709	0.694053	0.548909			0.343952	0.32343	0.24304	0.3741	0.37383
		0.0777843	0.352345	0.322265	0.209163	0.277989			0.371578	0.340337	0.299841	0.274691	0.63109
